# Supplementary material for: Potentially Toxic Planktic and Benthic Cyanobacteria in Slovenian Freshwater Bodies: Detection by Quantitative PCR
Source: MDPI journal article supplement (doi:10.3390/toxins13020133), 2021-02-11
Supplement: s1 [file s1]

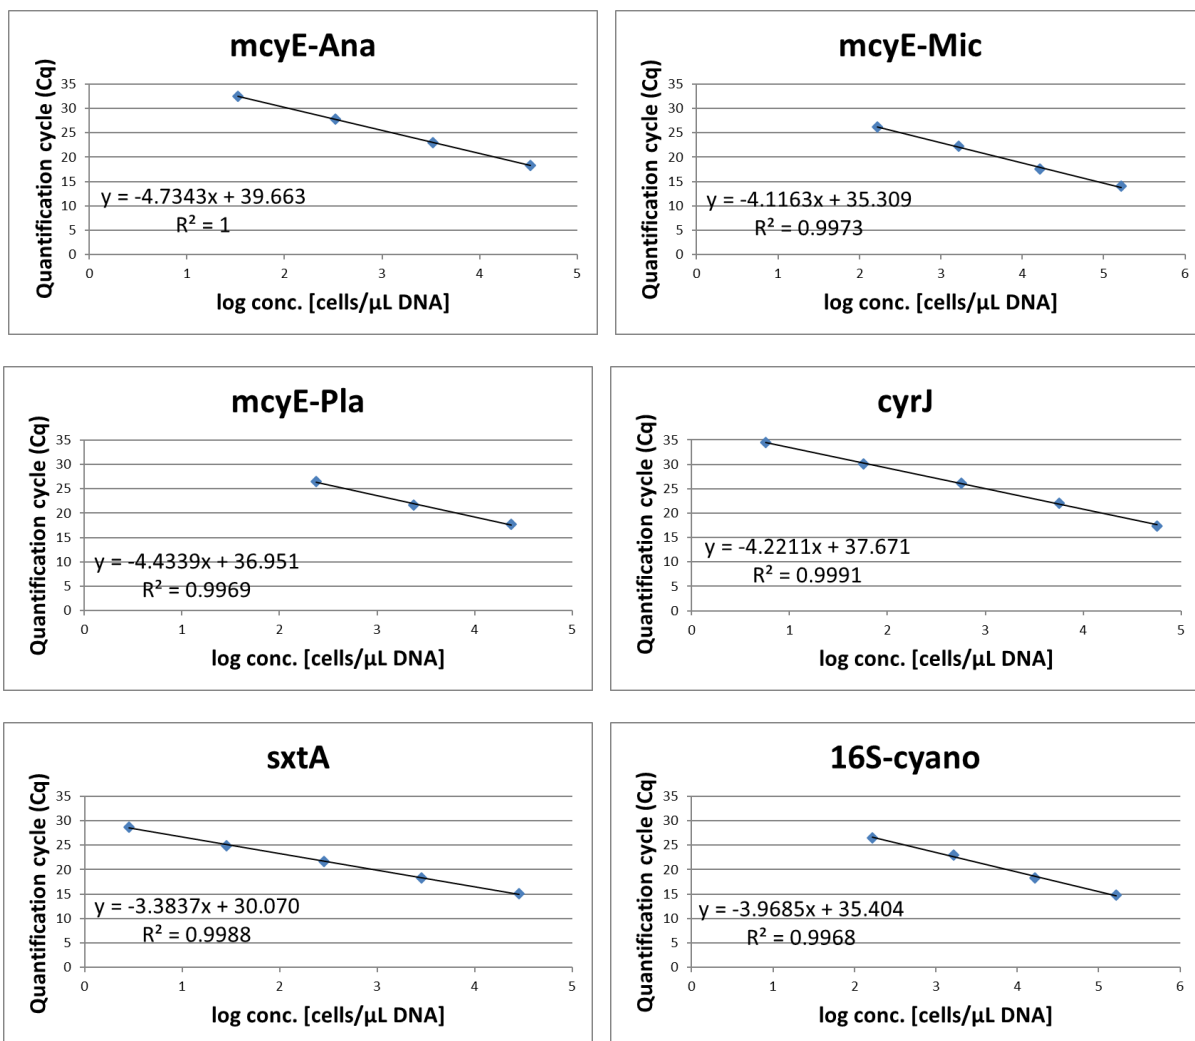

Supplementary figure S6: Linear ranges of calibration curves for selected qPCR assays based on dilutions of reference cyanobacterial cultures DNA.
