# Supplementary material for: Potentially Toxic Planktic and Benthic Cyanobacteria in Slovenian Freshwater Bodies: Detection by Quantitative PCR
Source: Toxins (Basel). 2021 Feb 11;13(2):133. doi: 10.3390/toxins13020133 (PMC7917684; doi:10.3390/toxins13020133)
Supplement: Supplementary file 1 [file toxins-13-00133-s001.zip]

Archive with 10 entries (10 files):
- Supplementary file S1.xlsx
- Supplementary file S10.xlsx
- Supplementary file S2.xlsx
- Supplementary file S3.xlsx
- Supplementary file S4.xlsx
- Supplementary file S5.xlsx
- Supplementary file S6.pdf
- Supplementary file S7.xlsx
- Supplementary file S8.xlsx
- Supplementary file S9.xlsx
