# Supplementary material for: Potentially Toxic Planktic and Benthic Cyanobacteria in Slovenian Freshwater Bodies: Detection by Quantitative PCR
Source: Toxins (Basel). 2021 Feb 11;13(2):133. doi: 10.3390/toxins13020133 (PMC7917684; doi:10.3390/toxins13020133)
Supplement: Supplementary file 1 [file toxins-13-00133-s001.zip › Supplementary file S1.xlsx]

## Sheet: Sheet1
Supplementary table S1: A review of general and genus-specific PCR and qPCR assays used for detection of cyanobacteria (general, microcystin-producers and anatoxin-a-producers). The assays that were tested in our study are underlined.
Target gene	Target group	Primer label	Nucleotide sequence (5' --> 3')	Fragment length (bp)	Reference	Designed for	Tested on environmental samples
mcyE, ndaF	cyanobacteria	McyE-F2/F2b	GAAATTTGTGTAGAAGGTGC/TGAAATTTGTGTAGAAGGTG	809 - 812	Rantala et al., 2004, Rantala et al., 2008	PCR	yes
		mcyE-R4	AATTCTAAAGCCCAAAGACG
mcyE, ndaF	cyanobacteria	DQmcyF	TTTAGAACSGGVGATTTAGG	128	Al-Tebrineh et al., 2011	qPCR	yes
		DQmcyR	CGRBTVADTTGRTATTCAATTTCT
mcyE, ndaF	cyanobacteria	mcyF + flap	AATAAATCATAATTTAGAACSGGVGATTTAGG	128	Al-Tebrineh et al., 2012	qPCR	no
		mcyR + flap	AATAAATCATAACGRBTVADTTGRTATTCAATTTCT
		mcyP	CY5-AATCAAGTTAAGGTVAATGGYTATCG-BHQ1
mcyE	Microcystis	127F	AAGCAAACTGCTCCCGGTATC	120	Sipari et al., 2010	qPCR	yes
		247R	CAATGGGAGCATAACGAGTCAA
		186P	CAATGGTTATCGAATTGACCCCGGAGAAAT
mcyE	Anabaena	611F	CTAGAGTAGTCACTCACGTC	126	Sipari et al., 2010	qPCR	yes
		737R	GGTTCTTGATAGTTAGATTGAGC
		672P	CAAGTTCCCACAATTCTTGGATTAGCAGC
mcyB	Microcystis	30F	CCTACCGAGCGCTTGGG	78	Kurmayer et al., 2003	qPCR	yes
		108R	GAAAATCCCCTAAAGATTCCTGAGT
		probe	FAM-CACCAAAGAAACACCCGAATCTGAGAGG-TAMRA
mcyA	Microcystis	mcyA-F	TTTCATCTCCATCGCCGCA	376	Li et al., 2014	qPCR	yes
		mcyA-R	GGACTCCCACTTGTTTACCGA
mcyA	cyanobacteria	mcyAcd-F	AAAATTAAAAGCCGTATCAAA	300	Hisbuerges et al., 2003	PCR	yes
		mcyAcd-R	AAAAGTGTTTTATTAGCGGCTCAT
mcyAB	cyanobacteria	mcyAB 135-F	GACTTATAGCCATCTCATCT	541	Mikalsen et al., 20013, Li et al., 2011	PCR	no
		mcyAB 676-R	TTGACGCTCTGTTTGTAA
mcyB	cyanobacteria	mcyB 2156-F	ATCACTTCAATCTAACGACT	955	Mikalsen et al., 20013, Li et al., 2011	PCR	no
		mcyB 3111-R	AGTTGCTGCTGTAAGAAA
anaC	cyanobacteria	anaC-gen-F2	TCTGGTATTCAGTMCCCTCYAT	366	Rantala-Ylinen et al., 2011, Sabart et al., 2015	PCR	yes
		anaC-gen-R2	CCCAATARCCTGTCATCAA
anaF	cyanobacteria	atxoaf	TCGGAAGCGCGATCGCAAATCG	461	Ballot et al., 2010, Legrand et al., 2016	PCR	yes
		atxar	GCTTCCTGAGAAGGTCCGCTAG
anaC	cyanobacteria	anxC-F	TGAGGGAACAAGTGAGTT	813	Rantala-Ylinen et al., 2011	PCR	no
		anxC-R	ATCATCTCCGATCCCAATCC
anaC	cyanobacteria	anxgen-F	ATGGTCAGAGGTTTTACAAG	861	Rantala-Ylinen et al., 2011	PCR	no
		anxgen-R	CGACTCTTAATCATGCGATC
anaC	Dolichospermum	anaC-anab-F	GCCCGATATTGAAACAAGT	263	Rantala-Ylinen et al., 2011	PCR	no
		anaC-anab-R	CACCCTCTGGAGATTGTTTA
anaC	Oscillatoria	anaC-osc-F	CTCTATTCTCACAAGTTTGGTCT	216	Rantala-Ylinen et al., 2011	PCR	no
		anaC-osc-R	GTTAGTTCAATATCAAGTGGTGGA
anaF	cyanobacteria	antx-F	CGCAAATCGATGCTCACTTA	412	Cadel-Six et al., 2009, Legrand et al., 2016	PCR	yes
		antx-R	CCACTGGCTCCATCTTGATT
16S rRNA	Microcystis	16S‐F	TATTGGGCGTAAAGCGTCCT	396	Li et al., 2014	qPCR	yes
		16S‐R	AACCACATACTCCACCGCTT
16S rRNA	cyanobacteria	Cya 359F	GGGGAATYTTCCGCAATGGG	446	Neilan et al., 1999, Martins et al., 2011	qPCR	yes
		Cya 781R	GACTACWGGGGTATCTAATCCCWTT
16S rRNA	cyanobacteria	27F1	AGAGTTTGATCCTGGCTCAG	803	Jungblut et al., 2005	PCR	yes
		809R	GCTTCGGCACGGCTCGGGTCGATA
16S rRNA	cyanobacteria	CYA359F	GGGGAATYTTCCGCAATGGG	447	Nubel et al 1997	PCR	no
		CYA781R(a)	GACTACTGGGGTATCTAATCCCATT
		CYA781R(b)	GACTACAGGGGTATCTAATCCCTTT
16S rRNA	Microcystis	209F	ATGTGCCGCGAGGTGAAACCTAAT	200	Neilan et al., 1997	PCR	no
		409R	TTACAA(C/T)CCAA(G/A)(G/A)(G/A)CCTTCCTCCC
16S rRNA	Aphanizomenon flos-aquae	CY16S-F1	CAGGATGAACGCTGGCGG	840	Park et al., 2018	PCR	no
		CY16S-R2	GAATGGGATTAGATACCCCA
16S rRNA	Aphanizomenon flos-aquae	CY16S-F3	AAAGGAGGTGATCCAGCCAC	763	Park et al., 2018	PCR	no
		CY16S-R1	TCCTTTGAGTTTCACAGTTG
References
Al-Tebrineh, J., Gehringer, M. M., Akcaalan, R., & Neilan, B. A. (2011). A new quantitative PCR assay for the detection of hepatotoxigenic cyanobacteria. Toxicon, 57(4), 546–554. https://doi.org/10.1016/j.toxicon.2010.12.018
Al-Tebrineh, J., Pearson, L. A., Yasar, S. A., & Neilan, B. A. (2012). A multiplex qPCR targeting hepato- and neurotoxigenic cyanobacteria of global significance. Harmful Algae, 15, 19–25. https://doi.org/10.1016/j.hal.2011.11.001
Ballot, A., Fastner, J., Lentz, M., & Wiedner, C. (2010). First report of anatoxin-a-producing cyanobacterium Aphanizomenon issatschenkoi in northeastern Germany. Toxicon, 56(6):964–971. https://doi.org/10.1016/j.toxicon.2010.06.021
Hisbergues, M., Christiansen, G., Rouhiainen, L., Sivonen, K., & Borner, T. (2003). PCR-based identification of microcystin-producing genotypes of different cyanobacterial genera. Archives of Microbiology, 180, 402–410. https://doi.org/10.1007/s00203-003-0605-9
Jungblut et al. (2005) Diversity within cyanobacterial mat communities in variable salinity meltwater ponds of McMurdo Ice Shelf, Antarctica. Environmental Microbiology 7(4):519-529. https://doi.org/10.1111/j.1462-2920.2005.00717.x.
Kurmayer, R., & Kutzenberger, T. (2003). Application of Real-Time PCR for Quantification of Microcystin Genotypes in a Population of the Toxic Cyanobacterium Microcystis sp, Applied and Environmental Microbiology, 69 (11) 6723-6730. https://doi.org/10.1128/AEM.69.11.6723-6730.2003
Jungblut, A.D., Hawes, I., Mountfort, D., Hitzfeld, B., Dietrich, D.R., Burns, B.P., & Neilan, B.A. (2005). Diversity within cyanobacterial mat communities in variable salinity meltwater ponds of McMurdo Ice Shelf, Antarctica. Environmental Microbiology, 7(4):519-29. doi: 10.1111/j.1462-2920.2005.00717.x.
Li, L., Jia, R., Liu, Y., & Zhang, H. (2011). Detection of microcystin-producing cyanobacteria in a reservoir by whole cell quantitative PCR. Procedia Environmental Sciences, 10(PART C), 2272–2279. https://doi.org/10.1016/j.proenv.2011.09.355
Li, D., Gu, A. Z., & He, M. (2014). Quantification and genetic diversity of total and microcystin-producing Microcystis during blooming season in Tai and Yang-cheng lakes, China. Journal of Applied Microbiology, 116(6), 1482–1494. https://doi.org/10.1111/jam.12456
Martins, A., Moreira, C., Vale, M., Freitas, M., Regueiras, A., Antunes, A., & Vasconcelos, V. (2011). Seasonal dynamics of Microcystis spp. and their toxigenicity as assessed by qPCR in a temperate reservoir. Marine Drugs, 9(10), 1715–1730. https://doi.org/10.3390/md9101715
Mikalsen, B., Boison, G., Skulberg, O. M., Fastner, J., Davies, W., Gabrielsen, T. M., Rudi, K., & Jakobsen, K. S. (2003). Natural variation in the microcystin synthetase operon mcyABC and impact on microcystin production in Microcystis strains. Journal of Bacteriology, 185(9), 2774–2785. https://doi.org/10.1128/JB.185.9.2774-2785.2003
Neilan et al. (1997) rRNA Sequences and Evolutionary Relationships among Toxic and Nontoxic Cyanobacteria of the Genus Microcystis. International Journal of Systematic Bacteriology 47(3): 693-697
Neilan, B. A., Dittmann, E., Rouhiainen, L., Bass, R. A., Schaub, V., Sivonen, K., & Börner, T. (1999). Nonribosomal peptide synthesis and toxigenicity of cyanobacteria. Journal of Bacteriology, 181(13), 4089–4097. https://doi.org/10.1128/jb.181.13.4089-4097.1999
Rantala, A., Fewer, D. P., Hisbergues, M., Rouhiainen, L., Vaitomaa, J., Börner, T., & Sivonen, K. (2004). Phylogenetic evidence for the early evolution of microcystin synthesis. Proceedings of the National Academy of Sciences of the United States of America, 101(2), 568–573. https://doi.org/10.1073/pnas.0304489101
Rantala, A., Rizzi, E., Castiglioni, B., De Bellis, G., & Sivonen, K. (2008). Identification of hepatotoxin-producing cyanobacteria by DNA-chip. Environmental Microbiology, 10(3), 653–664. https://doi.org/10.1111/j.1462-2920.2007.01488.x
Rantala-Ylinen, A., Känä, S., Wang, H., Rouhiainen, L., Wahlsten, M., Rizzi, E., Berg, K., Gugger, M., & Sivonen, K. (2011). Anatoxin-a synthetase gene cluster of the cyanobacterium Anabaena sp. strain 37 and molecular methods to detect potential producers. Applied and Environmental Microbiology, 77(20), 7271–7278. https://doi.org/10.1128/AEM.06022-11
Sabart, M., Crenn, K., Perrière, F., Abila, A., Leremboure, M., Colombet, J., Jousse, C., & Latour, D. (2015). Co-occurrence of microcystin and anatoxin-a in the freshwater lake Aydat (France): Analytical and molecular approaches during a three-year survey. Harmful Algae, 48, 12–20. https://doi.org/10.1016/j.hal.2015.06.007
Sipari, H., Rantala-Ylinen, A., Jokela, J., Oksanen, I., & Sivonen, K. (2010). Development of a chip assay and quantitative PCR for detecting microcystin synthetase e gene expressions. Applied and Environmental Microbiology, 76(12), 3797–3805. https://doi.org/10.1128/AEM.00452-10
