# Supplementary material for: Potentially Toxic Planktic and Benthic Cyanobacteria in Slovenian Freshwater Bodies: Detection by Quantitative PCR
Source: Toxins (Basel). 2021 Feb 11;13(2):133. doi: 10.3390/toxins13020133 (PMC7917684; doi:10.3390/toxins13020133)
Supplement: Supplementary file 1 [file toxins-13-00133-s001.zip › Supplementary file S2.xlsx]

## Sheet: Sheet1
Supplementary table S2: Specificity testing of qPCR assay 16S-cyano with plant samples and pure heterotrophic bacterial cultures. Threshold value was 0.4 (manually set within linear part of exponential curve). Cq - quantification cycle, Tm - melting temperature (in °C), N - no specific amplification.
Sample	Sample type	DNA dilution	16S-cyano
			Cq	Tm
Salmonella enterica subsp. enterica ser. infantis 116/15	heterotrophic bacteria	10-1	N	N
			N	N
			N	N
Salmonella enterica subsp. enterica ser. infantis 116/15	heterotrophic bacteria	10-2	N	N
			N	N
			N	N
Escherichia coli N17	heterotrophic bacteria	10-1	N	N
			N	N
			N	N
Escherichia coli N17	heterotrophic bacteria	10-2	N	N
			N	N
			N	N
Brevundimonas sp. CM 282 (MT058)	heterotrophic bacteria	10-1	N	N
			N	N
			N	N
Brevundimonas sp. CM 282 (MT058)	heterotrophic bacteria	10-2	N	N
			N	N
			N	N
Pseudomonas fluorescens A11 (MT018)	heterotrophic bacteria	10-1	N	N
			N	N
			N	N
Pseudomonas fluorescens A11 (MT018)	heterotrophic bacteria	10-2	N	N
			N	N
			N	N
Arcobacter butzleri LMG 10828	heterotrophic bacteria	10-1	N	N
			N	N
			N	N
Arcobacter butzleri LMG 10828	heterotrophic bacteria	10-2	N	N
			N	N
			N	N
Solanum lycopersicum (tomato) D755/20	plant	10-1	14.1155	81.9
			14.2743	81.9
			14.0937	81.9
Solanum lycopersicum (tomato) D755/20	plant	10-2	17.4684	81.6
			17.3911	81.9
			17.6176	81.9
Solanum lycopersicum (tomato) D756/20	plant	10-1	14.7246	81.8
			14.6176	81.8
			14.6948	81.8
Solanum lycopersicum (tomato) D756/20	plant	10-2	18.8217	81.3
			17.9714	81.8
			18.1919	81.8
Vitis vinifera (common grapevine) L33/5	plant	10-1	22.4538	81.8
			22.2788	81.8
			22.804	81.6
Vitis vinifera (common grapevine) L33/5	plant	10-2	25.9646	81.8
			26.1443	81.8
			26.3233	81.3
Clematis sp. D384/13	plant	10-1	18.0957	81.8
			17.8456	81.8
			18.3159	81.3
Clematis sp. D384/13	plant	10-2	21.0242	82.1
			20.9418	82.1
			21.0432	81.8
Clematis sp. D380/13	plant	10-1	N	N
			N	N
			N	N
Clematis sp. D380/13	plant	10-2	21.163	81.3
			20.5889	82.1
			20.5063	82.1
Alnus glutinosa (common alder) D590/11	plant	10-1	15.5784	82.7
			17.0763	82.1
			16.9189	82.1
Alnus glutinosa (common alder) D590/11	plant	10-2	20.3619	82.1
			20.2519	82.1
			20.3939	82.1
