# Supplementary material for: Potentially Toxic Planktic and Benthic Cyanobacteria in Slovenian Freshwater Bodies: Detection by Quantitative PCR
Source: Toxins (Basel). 2021 Feb 11;13(2):133. doi: 10.3390/toxins13020133 (PMC7917684; doi:10.3390/toxins13020133)
Supplement: Supplementary file 1 [file toxins-13-00133-s001.zip › Supplementary file S3.xlsx]

## Sheet: Sheet1
Supplementary table S3: Results of dilution series of DNA from pure cyanobacterial cultures with selected qPCR assays in three technical replicates. Threshold values were set manually for each assay within linear part of exponential curve; mcyE-Ana 0.4, mcyE-Mic 0.4, mcyE-Pla 0.2, cyrJ 0.6, sxtA 0.2, 16S-cyano 0.4. Cyanobacterial cultures used: mcyE-Ana - Anabaena sp. UHCC 0315, mcyE-Mic and 16S-…
DNA dilution	qPCR assays
	mcyE-Ana		mcyE-Mic		mcyE-Pla		cyrJ		sxtA		16S-cyano
	Cq	Tm	Cq	Tm	Cq	Tm	Cq	Tm	Cq	Tm	Cq	Tm
10-1	18.3953	75.6	13.975	78	17.8979	77.4	17.4407	80	15.2525	79.5	14.9355	81
	18.2987	75.6	13.9146	78	17.5952	77.4	17.3019	80	15.0748	79.5	14.9536	80.7
	18.1161	75.9	14.1314	78	17.5721	77.4	17.3012	79.8	15.0779	79.2	14.6768	81.2
10-2	22.896	75.6	17.5594	78.2	21.7409	77.7	22.0038	80	18.2252	79.5	18.2299	81
	22.9999	75.9	17.6034	78.2	21.6296	77.7	22.1287	80	18.3728	79.5	18.3672	81
	23.0411	75.9	17.5581	78.2	21.7148	77.6	22.1404	79.8	18.3728	79.5	18.2884	81.2
10-3	27.6129	75.9	22.2824	78.2	26.4184	77.7	26.0304	80	21.5322	79.7	22.9126	81
	27.7921	75.9	22.4719	78.2	26.5962	77.7	26.1802	80	21.7096	79.5	22.9201	81.2
	27.8827	75.9	22.1808	78.2	26.6542	77.6	26.191	79.8	21.6597	79.5	22.9345	81.2
10-4	31.8304	75.9	26.0573	78.2	N	N	30.3788	80	24.833	79.7	26.5118	81.2
	33.1739	76.2	26.2811	78.2	34.4974	77.7	30.0501	80	25.064	79.5	26.6693	81.2
	32.3652	76.1	26.1074	78.2	33.1332	77.6	30.0232	79.8	24.8959	79.5	26.4428	81.2
10-5	N	N	34.0896	78.2	33.2043	77.7	34.4519	79.8	28.1842	79.7	N	N
	35.0349	76.2	33.0731	78.2	N	N	34.4871	79.8	29.0928	79.5	N	N
	N	N	32.9979	78.2	36.715	77.9	34.3324	79.8	28.9725	79.5	N	N
10-6	N	N	41.7457	78.5	N	N	N	N	31.9385	79.7	N	N
	N	N	N	N	N	N	35.9852	79.8	32.2409	79.7	N	N
	N	N	N	N	N	N	N	N	31.5253	79.5	N	N
10-7	40.9257	75.6	N	N	N	N	N	N	N	N	N	N
	N	N	N	N	N	N	N	N	N	N	N	N
	N	N	N	N	N	N	N	N	33.9101	79.5	N	N
