# Supplementary material for: Potentially Toxic Planktic and Benthic Cyanobacteria in Slovenian Freshwater Bodies: Detection by Quantitative PCR
Source: Toxins (Basel). 2021 Feb 11;13(2):133. doi: 10.3390/toxins13020133 (PMC7917684; doi:10.3390/toxins13020133)
Supplement: Supplementary file 1 [file toxins-13-00133-s001.zip › Supplementary file S4.xlsx]

## Sheet: Results
Supplementary table S4: Specificity of selected qPCR assays, tested with pure cyanobacterial cultures. Threshold values were set manually for each assay within linear part of exponential curve; mcyE-Ana 0.4, mcyE-Mic 0.4, mcyE-Pla 0.2, cyrJ 0.6, sxtA 0.2, 16S-cyano 0.4. All reactions were performed in three technical replicates with DNA template in 10-2 dilution. Cq - quantification cycle, Tm - m…
Cyanobacterial culture	qPCR assays
	mcyE-Ana		mcyE-Mic		mcyE-Pla		cyrJ		sxtA		16S-cyano
	Cq	Tm	Cq	Tm	Cq	Tm	Cq	Tm	Cq	Tm	Cq	Tm
Anabaena sp. UHCC 0315	25.878	75.6	N	N	N	N	N	N	N	N	23.142	81
	25.9104	75.6	N	N	N	N	N	N	N	N	23.1789	81
	25.8031	75.9	N	N	N	N	N	N	N	N	23.0797	81.2
Microcystis aeruginosa PCC 7806	N	N	19.6335	78	N	N	N	N	N	N	20.1764	81
	N	N	19.8437	78	N	N	N	N	N	N	20.1527	81
	N	N	19.9734	78	N	N	N	N	N	N	20.0814	81
Planktothrix sp. NIVA-CYA126/8	N	N	N	N	24.2627	77.7	N	N	N	N	23.5617	81
	N	N	N	N	24.5617	77.4	N	N	N	N	23.5371	81.2
	N	N	N	N	24.2776	77.7	N	N	N	N	23.5616	81.2
Aphanizomenon ovalisporum ILC-164	N	N	N	N	N	N	24.6979	80.1	N	N	23.7553	81.3
	N	N	N	N	N	N	24.8388	80.1	N	N	23.8362	81.2
	N	N	N	N	N	N	24.8389	79.8	N	N	24.0106	81.2
Aphanizomenon gracileNIVA-CYA 851	N	N	N	N	N	N	N	N	18.6448	79.8	18.7526	81.3
	N	N	N	N	N	N	N	N	18.8415	79.5	18.9404	81.2
	N	N	N	N	N	N	N	N	18.6687	79.5	18.6627	81.5
