# Supplementary material for: Potentially Toxic Planktic and Benthic Cyanobacteria in Slovenian Freshwater Bodies: Detection by Quantitative PCR
Source: Toxins (Basel). 2021 Feb 11;13(2):133. doi: 10.3390/toxins13020133 (PMC7917684; doi:10.3390/toxins13020133)
Supplement: Supplementary file 1 [file toxins-13-00133-s001.zip › Supplementary file S5.xlsx]

## Sheet: Results
Supplementary table S5: Raw qPCR results, each reaction was performed in three technical replicates. Threshold values were set manually for each assay within linear part of exponential curve; mcyE-Ana 0.4, mcyE-Mic 0.4, mcyE-Pla 0.2, cyrJ 0.6, sxtA 0.2, 16S-cyano 0.4. All reactions except BL1.5 (noted) were performed with DNA template in 10-1 dilution. Samples description is available in Suppleme…
Sample	qPCR assays
	mcyE-Ana		mcyE-Mic		mcyE-Pla		cyrJ		sxtA		16S-cyano
	Cq	Tm	Cq	Tm	Cq	Tm	Cq	Tm	Cq	Tm	Cq	Tm
BL1.1	N	N	N	N	16.7765	77.7	N	N	N	N	15.9453	81
	N	N	N	N	16.6182	77.7	N	N	N	N	15.9256	81.2
	N	N	N	N	16.6347	77.7	N	N	N	N	15.8495	81.2
BL1.2	N	N	N	N	16.9418	77.7	N	N	N	N	15.9421	81.3
	N	N	N	N	16.9899	77.7	N	N	N	N	15.9663	81.2
	N	N	N	N	17.0201	77.7	N	N	N	N	15.9856	81.2
BL1.3	N	N	N	N	18.5484	77.7	N	N	N	N	17.2499	81.3
	N	N	N	N	18.5756	77.7	N	N	N	N	17.2188	81.2
	N	N	N	N	18.5777	77.7	N	N	N	N	17.1642	81.2
BL1.4	NA	NA	NA	NA	NA	NA	NA	NA	NA	NA	NA	NA
	NA	NA	NA	NA	NA	NA	NA	NA	NA	NA	NA	NA
	NA	NA	NA	NA	NA	NA	NA	NA	NA	NA	NA	NA
BL1.5 (10x dilution)	N	N	N	N	N	N	N	N	N	N	28.4652	81.3
	N	N	N	N	N	N	N	N	N	N	28.6384	81.2
	N	N	N	N	N	N	N	N	N	N	28.6838	81.2
BL1.5 (100x dilution)	N	N	N	N	24.0081	77.7	N	N	N	N	23.9082	81
	N	N	N	N	24.0505	77.7	N	N	N	N	23.8509	81.3
	N	N	N	N	23.8733	77.7	N	N	N	N	23.7881	81.2
BL1.6	N	N	N	N	24.3632	78	N	N	N	N	21.3416	81.3
	N	N	N	N	24.2375	77.7	N	N	N	N	21.4162	81.2
	N	N	N	N	24.2364	77.7	N	N	N	N	21.3165	81.5
BL1.7	N	N	N	N	23.4743	78	N	N	N	N	22.2939	81.3
	N	N	N	N	23.6182	78	N	N	N	N	22.3492	81.5
	N	N	N	N	23.5909	77.7	N	N	N	N	22.3274	81.5
BL1.8	N	N	N	N	23.3073	78	N	N	N	N	19.8971	81.3
	N	N	N	N	23.1922	78	N	N	N	N	19.7974	81.5
	N	N	N	N	23.2658	77.9	N	N	N	N	19.8402	81.5
BL1.9	N	N	N	N	24.9949	78	N	N	N	N	21.253	81.6
	N	N	N	N	25.1795	78	N	N	N	N	21.3971	81.5
	N	N	N	N	24.936	77.9	N	N	N	N	21.3107	81.5
BL1.10	N	N	N	N	22.8996	78	N	N	N	N	21.1538	81.6
	N	N	N	N	22.7856	78	N	N	N	N	21.0494	81.5
	N	N	N	N	22.8573	77.9	N	N	N	N	21.1136	81.5
BL1.11	N	N	N	N	25.6552	77.7	N	N	N	N	23.3057	81.3
	N	N	N	N	25.8251	77.7	N	N	N	N	23.3911	81
	N	N	N	N	25.8361	77.7	N	N	N	N	23.2503	81.2
BL1.12	N	N	N	N	18.7299	77.2	N	N	N	N	18.5452	80.5
	N	N	N	N	18.7348	77.2	N	N	N	N	18.4452	80.8
	N	N	N	N	18.738	77.2	N	N	N	N	18.3823	80.8
BO1	N	N	N	N	N	N	N	N	N	N	21.5636	80.7
	N	N	N	N	N	N	N	N	N	N	21.4032	81
	N	N	N	N	N	N	N	N	N	N	21.4259	81
BO2	N	N	N	N	N	N	N	N	N	N	22.4491	80.5
	N	N	N	N	N	N	N	N	N	N	22.4425	80.5
	N	N	N	N	N	N	N	N	N	N	22.3634	80.8
BO3	N	N	N	N	N	N	N	N	N	N	21.596	80.5
	N	N	N	N	N	N	N	N	N	N	21.3042	80.7
	N	N	N	N	31.9531	77.7	N	N	N	N	21.4409	80.7
PE1	N	N	30.3946	78.3	N	N	N	N	N	N	17.559	81.3
	N	N	30.2269	78	N	N	N	N	N	N	17.5956	81.3
	N	N	30.3781	78.3	N	N	N	N	N	N	17.5681	81.2
PE2	N	N	28.5225	78	N	N	N	N	N	N	18.2219	80.5
	N	N	28.7251	78	N	N	N	N	N	N	18.2958	80.8
	N	N	28.246	77.8	N	N	N	N	N	N	18.0565	81
PE3	N	N	28.4862	78.3	N	N	N	N	N	N	17.5868	81.5
	N	N	28.9471	78.2	N	N	N	N	N	N	17.5452	81.5
	N	N	29.0058	78	N	N	N	N	N	N	17.5156	81.5
PE4	N	N	34.1326	78	N	N	N	N	N	N	15.977	81.5
	N	N	35.0797	78.2	N	N	N	N	N	N	15.9993	81.5
	N	N	33.3507	78	N	N	N	N	N	N	16.0913	81.5
SL1	N	N	28.2612	78.3	N	N	N	N	N	N	20.535	81.3
	N	N	28.336	78.2	N	N	N	N	N	N	20.7385	81.3
	N	N	28.3744	78.3	N	N	N	N	N	N	20.7129	81.5
SL2	N	N	25.9911	78.3	N	N	N	N	N	N	21.2604	81
	N	N	26.0965	78.2	N	N	N	N	N	N	21.2082	81.3
	N	N	25.9427	78.3	N	N	N	N	N	N	21.1811	81.2
SL3	N	N	27.7406	78	N	N	N	N	N	N	20.5746	80.5
	N	N	27.8046	78	N	N	N	N	N	N	20.788	80.5
	N	N	27.7208	77.8	N	N	N	N	N	N	20.5265	80.8
VO1	N	N	29.7429	78	N	N	N	N	N	N	21.1684	81
	N	N	29.7066	78	N	N	N	N	N	N	20.8188	81.3
	N	N	30.3026	77.7	N	N	N	N	N	N	20.8335	81.2
VO2	N	N	28.6356	78	N	N	N	N	N	N	20.7193	81
	N	N	28.1834	78	N	N	N	N	N	N	20.7404	81
	N	N	28.1357	78	N	N	N	N	N	N	20.6293	81.2
VO3	N	N	27.2259	78	N	N	N	N	N	N	20.3361	81
	N	N	27.0922	78	N	N	N	N	N	N	20.3028	81
	N	N	27.4162	78	N	N	N	N	N	N	20.2508	81.2
BL2.1	N	N	N	N	N	N	N	N	N	N	20.1207	80.4
	N	N	N	N	N	N	N	N	N	N	19.9922	80.7
	N	N	N	N	N	N	N	N	N	N	20.0395	80.7
BL2.2	N	N	N	N	N	N	33.2935	80.3	N	N	19.7207	80.4
	N	N	N	N	N	N	35.3176	80	N	N	19.4766	80.7
	N	N	N	N	N	N	33.271	80	N	N	19.6321	80.9
BL2.3	N	N	N	N	N	N	N	N	27.435	79.7	20.9778	80.4
	N	N	N	N	N	N	N	N	27.7588	79.4	20.8353	80.7
	N	N	N	N	N	N	N	N	28.7013	79.4	20.7214	80.7
BL2.4	N	N	N	N	N	N	N	N	31.5719	79.5	20.1476	80.5
	N	N	N	N	N	N	N	N	30.7419	79.5	20.1187	80.8
	N	N	N	N	N	N	N	N	32.1158	79.5	20.0424	80.8
BL2.5	N	N	N	N	N	N	N	N	N	N	18.8378	80.7
	N	N	N	N	N	N	N	N	N	N	18.8608	81
	N	N	N	N	N	N	N	N	N	N	18.9	80.9
BL2.6	N	N	N	N	N	N	33.1939	80.3	N	N	20.6845	80.7
	N	N	N	N	N	N	33.6763	80	N	N	20.7584	80.7
	N	N	N	N	N	N	34.275	80	N	N	20.8123	80.7
BL2.7	N	N	N	N	N	N	N	N	32.1086	79.7	20.3129	81
	N	N	N	N	N	N	N	N	30.6672	79.7	20.5058	81
	N	N	N	N	N	N	N	N	32.1715	79.7	20.5288	80.9
BL2.8	N	N	N	N	N	N	N	N	N	N	20.7309	80.7
	N	N	N	N	N	N	N	N	N	N	20.7535	81
	N	N	N	N	N	N	N	N	N	N	20.6825	80.9
BL2.9	N	N	N	N	N	N	N	N	N	N	18.8992	81.3
	N	N	N	N	N	N	N	N	N	N	18.9586	81.3
	N	N	N	N	N	N	N	N	N	N	19.0653	81.2
BL2.10	N	N	N	N	N	N	N	N	30.3586	80	18.0588	81
	N	N	N	N	N	N	N	N	29.7427	80	18.0786	81.3
	N	N	N	N	N	N	N	N	31.6445	79.7	18.0449	81.2
SO1	N	N	N	N	N	N	N	N	N	N	20.9262	80.2
	N	N	N	N	N	N	N	N	N	N	20.9863	80.2
	N	N	N	N	N	N	N	N	N	N	20.9748	80.2
SO2	N	N	N	N	N	N	N	N	N	N	17.7818	81.3
	N	N	N	N	N	N	N	N	N	N	17.8371	81.3
	N	N	N	N	N	N	N	N	N	N	18.0875	80.9
SO3	N	N	N	N	N	N	N	N	N	N	16.3622	81
	N	N	N	N	N	N	N	N	N	N	16.3219	81
	N	N	N	N	N	N	N	N	N	N	16.2301	81
LU	N	N	N	N	N	N	N	N	N	N	15.0933	80.4
	N	N	N	N	N	N	N	N	N	N	15.0867	80.7
	N	N	N	N	N	N	N	N	N	N	15.1472	80.7
BI	N	N	N	N	N	N	N	N	N	N	20.8395	80.8
	N	N	N	N	N	N	N	N	N	N	20.8692	80.8
	N	N	N	N	N	N	N	N	N	N	20.7611	81
PS	N	N	N	N	N	N	N	N	N	N	14.0129	80.4
	N	N	N	N	N	N	N	N	N	N	15.2345	80.7
	N	N	N	N	N	N	N	N	N	N	13.9503	80.7
SA1	N	N	N	N	N	N	N	N	N	N	14.6623	80.4
	N	N	N	N	N	N	N	N	N	N	14.791	80.4
	N	N	N	N	N	N	N	N	N	N	14.6562	80.7
SA2	N	N	N	N	N	N	N	N	N	N	16.9781	81
	N	N	N	N	N	N	N	N	N	N	16.979	81
	N	N	N	N	N	N	N	N	N	N	16.9766	81.2
RI	N	N	N	N	N	N	N	N	N	N	22.3155	80.2
	N	N	N	N	N	N	N	N	N	N	21.7607	80.2
	N	N	N	N	N	N	N	N	N	N	22.0042	80.2
LJ	N	N	N	N	N	N	N	N	N	N	14.0977	81.3
	N	N	N	N	N	N	N	N	N	N	14.2895	81.3
	N	N	N	N	N	N	N	N	N	N	14.1788	81.2
KO	N	N	33.9397	77.9	N	N	N	N	30.5666	79.8	15.3816	81
	N	N	33.6632	77.9	N	N	N	N	30.1181	79.4	15.5573	81
	N	N	34.4137	77.9	N	N	N	N	30.4888	79.4	15.5699	81.2
TI	N	N	N	N	N	N	N	N	N	N	19.7345	81.3
	N	N	N	N	N	N	N	N	N	N	19.9429	81.3
	N	N	N	N	N	N	N	N	N	N	19.7904	81.2
GL	N	N	N	N	N	N	N	N	N	N	17.7254	81
	N	N	N	N	N	N	N	N	N	N	17.7054	81
	N	N	N	N	N	N	N	N	N	N	17.6409	81
