# Supplementary material for: Potentially Toxic Planktic and Benthic Cyanobacteria in Slovenian Freshwater Bodies: Detection by Quantitative PCR
Source: Toxins (Basel). 2021 Feb 11;13(2):133. doi: 10.3390/toxins13020133 (PMC7917684; doi:10.3390/toxins13020133)
Supplement: Supplementary file 1 [file toxins-13-00133-s001.zip › Supplementary file S7.xlsx]

## Sheet: Sheet1
Supplementary table S7: Raw qPCR results from test environmental samples, used for evaluation of qPCR assays. Threshold values were set manually for each assay within linear part of exponential curve; mcyE-Ana 0.4, mcyE-Mic 0.4, mcyE-Pla 0.2, cyrJ 0.6, sxtA 0.2, 16S-cyano 0.4. All reactions were performed with DNA template in 10-2 diution in three technical replicates. Cq - quantification cycle, …
Sample ID	Sampling location	Water body type	Sample type	Sampling time	qPCR assays
					mcyE-Ana		mcyE-Mic		mcyE-Pla		cyrJ		sxtA		16S-cyano
					Cq	Tm	Cq	Tm	Cq	Tm	Cq	Tm	Cq	Tm	Cq	Tm
T-KO1	Koseze Pond	urban pond	plankton	June 2019	N	N	N	N	N	N	N	N	N	N	22.7398	81.7
					N	N	N	N	N	N	N	N	N	N	22.7191	81.7
					N	N	N	N	N	N	N	N	N	N	22.8645	81.7
T-KO2	Koseze Pond	urban pond	plankton	July 2019	N	N	25.4065	77.7	N	N	N	N	N	N	21.2363	81.7
					N	N	25.4071	78	N	N	N	N	N	N	21.4251	81.4
					N	N	25.4038	77.9	N	N	N	N	N	N	21.4964	81.7
T-KO3	Koseze Pond	urban pond	plankton	August 2019	N	N	32.2746	78	N	N	N	N	30.8374	79.8	23.2726	81
					N	N	31.2353	78	N	N	N	N	29.9827	79.5	23.339	81.2
					N	N	33.0354	78.3	N	N	N	N	31.4934	79.5	23.272	81.2
T-TI1	Tivoli Pond	urban pond	plankton	June 2019	N	N	31.2398	78	N	N	N	N	N	N	21.8745	81.7
					N	N	30.3537	78.2	N	N	N	N	N	N	22.0016	81.7
					N	N	30.5984	78.2	N	N	N	N	N	N	22.0802	81.7
T-TI2	Tivoli Pond	urban pond	plankton	July 2019	N	N	N	N	N	N	N	N	N	N	27.2637	81.7
					N	N	N	N	N	N	N	N	N	N	27.6614	81.7
					N	N	N	N	N	N	N	N	N	N	27.6316	81.7
T-TI3	Tivoli Pond	urban pond	plankton	August 2019	N	N	N	N	N	N	N	N	N	N	22.6063	81.5
					N	N	N	N	N	N	N	N	N	N	22.6748	81.5
					N	N	N	N	N	N	N	N	N	N	22.7865	81.5
T-PE1	Lake Pernica	lake	plankton	March 2019	N	N	N	N	N	N	N	N	N	N	20.1197	81.7
					N	N	31.301	78	N	N	N	N	N	N	20.1979	82
					N	N	33.0954	78.2	N	N	N	N	N	N	20.2902	81.7
T-VE	Lake Velenje	lake	plankton	March 2019	N	N	N	N	26.3976	77.9	N	N	N	N	22.7834	81.7
					N	N	N	N	26.5422	77.9	N	N	N	N	22.9718	81.7
					N	N	N	N	26.674	77.9	N	N	N	N	22.9443	82
T-GL	Glinscica	urban stream	plankton	July 2019	NA	NA	N	N	N	N	N	N	N	N	21.4551	81.5
					NA	NA	N	N	N	N	N	N	N	N	21.5278	81.4
					NA	NA	N	N	N	N	N	N	N	N	21.6631	81.4
T-TI4	Tivoli Pond	urban pond	cyanobacterial bloom	August 2013	N	N	16.1038	78.5	N	N	N	N	N	N	16.2649	82
					N	N	16.1406	78.5	N	N	N	N	N	N	16.2539	82
					N	N	16.279	78.5	32.5915	77.7	N	N	N	N	16.289	82.3
T-HV	Hotinja vas Pond	urban pond	cyanobacterial bloom	August 2009	N	N	31.6679	78.2	N	N	N	N	N	N	25.7839	82
					N	N	32.1223	78.5	N	N	N	N	N	N	25.8505	82
					NA	NA	32.8645	78.5	N	N	N	N	N	N	25.9655	82
T-PE2	Lake Pernica	lake	cyanobacterial bloom	August 2015	N	N	N	N	N	N	N	N	N	N	24.0288	81.7
					N	N	N	N	N	N	N	N	N	N	23.882	82
					N	N	N	N	N	N	N	N	N	N	24.0486	82
T-KO4	Koseze Pond	urban pond	cyanobacterial bloom	August 2013	N	N	N	N	N	N	N	N	N	N	24.5726	81.5
					N	N	N	N	N	N	N	N	N	N	24.5622	81.4
					N	N	N	N	N	N	N	N	N	N	24.74	81.4
T-BL	Lake Bled	lake	cyanobacterial bloom	February 2019	NA	NA	N	N	16.2594	77.9	N	N	N	N	16.0519	82
					NA	NA	N	N	15.8263	77.9	N	N	N	N	16.1605	82
					NA	NA	N	N	16.1919	77.9	N	N	N	N	16.2996	82
