# Supplementary material for: Potentially Toxic Planktic and Benthic Cyanobacteria in Slovenian Freshwater Bodies: Detection by Quantitative PCR
Source: Toxins (Basel). 2021 Feb 11;13(2):133. doi: 10.3390/toxins13020133 (PMC7917684; doi:10.3390/toxins13020133)
Supplement: Supplementary file 1 [file toxins-13-00133-s001.zip › Supplementary file S8.xlsx]

## Sheet: List1
Supplementary table S8: Sample information and results from qPCR, microscopic counts and cyanotoxin analysis with LC-MS/MS. Microscopic counts for all MC-producers include genera Dolichospermum (ex Anabaena), Microcystis, Phormidium, Pseudanabaena and Planktothrix (Supplementary file S9). For plankton, qPCR results are expressed as copy numbers per mL or cells per mL. Due to low amplification eff…
					Microcystins (MC)																					Cylindrospermopsins (CYR)						Saxitoxins (SXT)
					Dolichospermum (ex Anabaena)					Microcystis					Planktothrix					All MC-producers
					qPCR		Microscopy			qPCR		Microscopy			qPCR		Microscopy			qPCR		Microscopy			LC-MS/MS	qPCR		Microscopy			LC-MS/MS	qPCR		Microscopy			LC-MS/MS
Sample ID	Sampling location	Water body type	Sample type	Sampling date	mcyE-Ana [gc/mL or cells/g]	mcyE-Ana [cells/mL or cells/g]	Dolichospermum [cells/mL]	Dolichospermum [mm3/L]	Relative abundance	mcyE-Mic [gc/mL or gc/g]	mcyE-Mic [cells/mL or cells/g]	Microcystis [cells/mL]	Microcystis [mm3/L]	Relative abundance	mcyE-Pla [gc/mL or gc/g]	mcyE-Pla [cells/mL or cells/g]	Planktothrix [cells/mL]	Planktothrix [mm3/L]	Relative abundance	mcyE [gc/mL or gc/g]	mcyE [cells/mL or cells/g]	MC-producers [cells/mL]	MC-producers [mm3/L]	Relative abundance	MC [ng/L]	cyrJ [gc/mL or gc/g]	cyrJ [cells/mL or cells/g]	CYR-producers [cells/mL]	CYR-producers [mm3/L]	Relative abundance	CYR [ng/L]	sxtA [gc/mL or gc/g]	sxtA [cells/mL or cells/g]	SXT-producers [cells/mL]	SXT-producers [mm3/L]	Relative abundance	SXT [ng/L]
BL1.1	Lake Bled	lake	plankton	2019-01-24	N	N	N	N	NA	N	N	N	N	NA	420052	22430.2	54834.9	2.325	NA	420052	22430.2	54834.9	2.325	NA	NA	N	N	155.039	0.01	NA	NA	N	N	155.039	0.01	NA	NA
BL1.2	Lake Bled	lake	plankton	2019-02-14	N	N	N	N	NA	N	N	N	N	NA	444562	24342.1	61910.4	2.625	NA	444562	24342.1	61910.4	2.625	NA	660.007	N	N	N	N	NA	N	N	N	N	N	NA	N
BL1.3	Lake Bled	lake	plankton	2019-03-21	N	N	N	N	NA	N	N	N	N	NA	224765	14004	32429.2	1.375	NA	224765	14004	32429.2	1.375	NA	NA	N	N	N	N	NA	NA	N	N	N	N	NA	NA
BL1.4	Lake Bled	lake	plankton	2019-04-18	NA	NA	N	N	NA	NA	NA	N	N	NA	NA	NA	3537.74	0.15	NA	NA	NA	3537.74	0.15	NA	64.6264	NA	NA	N	N	NA	N	NA	NA	N	N	NA	N
BL1.5	Lake Bled	lake	plankton	2019-05-23	N	N	N	N	NA	N	N	N	N	NA	181397	17572.9	3537.74	0.15	NA	181397	17572.9	3537.74	0.15	NA	27.3293	N	N	N	N	NA	N	N	N	N	N	NA	N
BL1.6	Lake Bled	lake	plankton	2019-06-18	N	N	N	N	NA	N	N	N	N	NA	8070.23	801.294	3537.74	0.15	NA	8070.23	801.294	3537.74	0.15	NA	9.5479	N	N	N	N	NA	N	N	N	N	N	NA	N
BL1.7	Lake Bled	lake	plankton	2019-07-15	N	N	127.119	0.015	NA	N	N	N	N	NA	18635	1745.01	5896.23	0.25	NA	18635	1745.01	6056.13	0.2659	NA	5.3721	N	N	127.119	0.015	NA	N	N	N	127.119	0.015	NA	N
BL1.8	Lake Bled	lake	plankton	2019-08-08	N	N	N	N	NA	N	N	N	N	NA	31996.4	2922.3	2948.11	0.125	NA	31996.4	2922.3	2980.9	0.1259	NA	7.02743	N	N	N	N	NA	N	N	N	N	N	NA	N
BL1.9	Lake Bled	lake	plankton	2019-09-12	N	N	N	N	NA	N	N	N	N	NA	9596.93	1013.65	2948.11	0.125	NA	9596.93	1013.65	4915.33	0.179	NA	8.10355	N	N	N	N	NA	N	N	N	N	N	NA	N
BL1.10	Lake Bled	lake	plankton	2019-10-07	N	N	N	N	NA	N	N	N	N	NA	40874.2	3611.06	5896.23	0.25	NA	40874.2	3611.06	5896.23	0.25	NA	15.7725	N	N	N	N	NA	N	N	N	N	N	NA	N
BL1.11	Lake Bled	lake	plankton	2019-11-25	N	N	N	N	NA	N	N	55.5556	0.004	NA	6169.32	691.905	29481.1	1.25	NA	6169.32	691.905	29536.7	1.254	NA	288.329	N	N	N	N	NA	N	N	N	N	N	NA	N
BL1.12	Lake Bled	lake	plankton	2019-12-17	N	N	N	N	NA	N	N	69.4444	0.005	NA	423542	26750.9	47169.8	2	NA	423542	26750.9	47239.3	2.005	NA	327.509	N	N	N	N	NA	N	N	N	N	N	NA	N
BO1	Lake Bohinj	lake	plankton	2019-07-09	N	N	N	N	NA	N	N	N	N	NA	N	N	N	N	NA	N	N	N	N	NA	N	N	N	N	N	NA	N	N	N	N	N	NA	N
BO2	Lake Bohinj	lake	plankton	2019-09-03	N	N	N	N	NA	N	N	N	N	NA	N	N	N	N	NA	N	N	N	N	NA	N	N	N	N	N	NA	N	N	N	N	N	NA	N
BO3	Lake Bohinj	lake	plankton	2019-12-17	N	N	N	N	NA	N	N	N	N	NA	4.17E+00 **	3.30E+00 **	N	N	NA	4.17E+00 **	3.30E+00 **	N	N	NA	0.9	N	N	N	N	NA	N	N	N	N	N	NA	N
PE1	Lake Pernica	reservoir	plankton	2019-04-24	N	N	834.646	0.106	NA	1.51E+04 *	8.24E+01 *	N	N	NA	N	N	5155.86	0.2	NA	1,51E+04 *	8.24E+01 *	89402.5	2.05315	NA	N	N	N	834.646	0.106	NA	N	N	N	834.646	0.106	NA	N
PE2	Lake Pernica	reservoir	plankton	2019-06-27	N	N	738.275	0.0875	NA	2.52E+04 *	752.888	232.538	0.0153567	NA	N	N	9708.74	0.3	NA	2,52E+04 *	752.888	29581.8	0.647177	NA	2.63875	N	N	1060.22	0.118934	NA	N	N	N	1417.04	0.159254	NA	N
PE3	Lake Pernica	reservoir	plankton	2019-08-22	N	N	112586	12.4787	NA	2.52E+04 *	631.196	3435.11	0.24317	NA	N	N	455663	14.08	NA	2,52E+04 *	631.196	574947	26.92	NA	2.464	N	N	114493	12.6253	NA	N	N	N	114864	12.6673	NA	N
PE4	Lake Pernica	reservoir	plankton	2019-10-24	N	N	N	N	NA	3.02E+03 **	1.65E+01 **	N	N	NA	N	N	708565	21.915	NA	3.02E+03 **	1.65E+01 **	859819	25.6849	NA	N	N	N	3451.96	0.45624	NA	N	N	N	3451.96	0.45624	NA	N
SL1	Lake Slivnica	reservoir	plankton	2019-06-13	N	N	N	N	NA	6.29E+03 *	207.464	981.001	0.055	NA	N	N	N	N	NA	6.29E+03 *	207.464	981.001	0.055	NA	0.7 ***	N	N	24.6914	0.002	NA	N	N	N	24.6914	0.002	NA	N
SL2	Lake Slivnica	reservoir	plankton	2019-08-07	N	N	N	N	NA	47440.1	1816.57	647.667	0.031	NA	N	N	N	N	NA	47440.1	1816.57	1284.2	0.131	NA	6.8625	N	N	N	N	NA	N	N	N	636.537	0.1	NA	N
SL3	Lake Slivnica	reservoir	plankton	2019-10-14	N	N	N	N	NA	6,86E+03 *	311.065	83.3333	0.006	NA	N	N	N	N	NA	6,86E+03 *	311.065	401.602	0.056	NA	4.97897	N	N	N	N	NA	N	N	N	318.269	0.05	NA	N
VO1	Lake Vogrscek	reservoir	plankton	2019-06-10	N	N	N	N	NA	3.21E+03 *	43.4443	N	N	NA	N	N	N	N	NA	3.21E+03 *	43.4443	N	N	NA	N	N	N	N	N	NA	N	N		N	N	NA	N
VO2	Lake Vogrscek	reservoir	plankton	2019-08-28	N	N	N	N	NA	6.29E+03 *	208.12	N	N	NA	N	N	N	N	NA	6.29E+03 *	208.12	N	N	NA	N	N	N	N	N	NA	N	N	N	N	N	NA	N
VO3	Lake Vogrscek	reservoir	plankton	2019-10-23	N	N	N	N	NA	6.29E+03 *	379.399	104.167	0.0075	NA	N	N	N	N	NA	6.29E+03 *	379.399	109.577	0.00835	NA	N	N	N	N	N	NA	N	N	N	5.41057	0.00085	NA	N
BL2.1	Lake Bled, P1	lake	biofilm	2019-08-12	N	N	NA	NA	N	N	N	NA	NA	N	N	N	NA	NA	N	N	N	NA	NA	N	N	N	N	NA	NA	N	N	2.31E+05 **	1.33E+02 **	NA	NA	N	N
BL2.2	Lake Bled, P2	lake	biofilm	2019-08-12	N	N	NA	NA	N	N	N	NA	NA	N	N	N	NA	NA	N	N	N	NA	NA	1	N	5.66E+03 **	4.80E+01 **	NA	NA	1	N	4.19E+04 **	2.40E+01 **	NA	NA	1	N
BL2.3	Lake Bled, P3	lake	biofilm	2019-08-12	N	N	NA	NA	N	N	N	NA	NA	N	N	N	NA	NA	N	N	N	NA	NA	1	1.1 ***	N	N	NA	NA	N	N	8.99E+05 *	15048.2	NA	NA	1	N
BL2.4	Lake Bled, P4	lake	biofilm	2019-08-12	N	N	NA	NA	N	N	N	NA	NA	N	N	N	NA	NA	N	N	N	NA	NA	1	N	N	N	NA	NA	N	N	9.27E+04 **	5.32E+01 **	NA	NA	1	N
BL2.5	Lake Bled, P5	lake	biofilm	2019-08-12	N	N	NA	NA	N	N	N	NA	NA	N	N	N	NA	NA	N	N	N	NA	NA	N	N	N	N	NA	NA	N	N	N	N	NA	NA	N	N
BL2.6	Lake Bled, P6	lake	biofilm	2019-08-12	N	N	NA	NA	N	N	N	NA	NA	N	N	N	NA	NA	N	N	N	NA	NA	1	11.9235	4.11E+04 *	10535	NA	NA	N	N	N	N	NA	NA	1	N
BL2.7	Lake Bled, P7	lake	biofilm	2019-08-12	N	N	NA	NA	N	N	N	NA	NA	N	2.00E+03 **	1.59E+03 **	NA	NA	N	2.00E+03 **	1.59E+03 **	NA	NA	1	N	N	N	NA	NA	N	N	3.33E+04 **	1.91E+01 **	NA	NA	1	N
BL2.8	Lake Bled, P8	lake	biofilm	2019-08-12	N	N	NA	NA	N	N	N	NA	NA	N	N	N	NA	NA	N	N	N	NA	NA	1	N	N	N	NA	NA	N	N	N	N	NA	NA	1	N
BL2.9	Lake Bled, P9	lake	biofilm	2019-08-12	N	N	NA	NA	N	N	N	NA	NA	N	N	N	NA	NA	N	N	N	NA	NA	N	N	N	N	NA	NA	N	N	N	N	NA	NA	N	N
BL2.10	Lake Bled, P10	lake	biofilm	2019-08-12	N	N	NA	NA	N	N	N	NA	NA	N	N	N	NA	NA	N	N	N	NA	NA	N	N	N	N	NA	NA	N	N	2.09E+05 *	590.279	NA	NA	N	N
SO1	Soca, P1	river	biofilm	2019-08-30	N	N	NA	NA	N	N	N	NA	NA	N	N	N	NA	NA	N	N	N	NA	NA	1	N	N	N	NA	NA	N	N	N	N	NA	NA	1	N
SO2	Soca, P2	river	biofilm	2019-08-30	N	N	NA	NA	N	N	N	NA	NA	N	N	N	NA	NA	N	N	N	NA	NA	1	N	N	N	NA	NA	N	N	N	N	NA	NA	1	N
SO3	Soca, P3	river	biofilm	2019-08-30	N	N	NA	NA	N	N	N	NA	NA	N	N	N	NA	NA	N	N	N	NA	NA	1	N	N	N	NA	NA	N	N	N	N	NA	NA	1	N
LU	Lukaj	stream	biofilm	2019-03-07	N	N	NA	NA	N	N	N	NA	NA	N	N	N	NA	NA	N	N	N	NA	NA	N	NA	N	N	NA	NA	N	NA	N	N	NA	NA	N	NA
BI	Bistrica	river	biofilm	2019-06-17	N	N	NA	NA	N	N	N	NA	NA	N	N	N	NA	NA	N	N	N	NA	NA	1	N	N	N	NA	NA	N	N	N	N	NA	NA	1	N
PS	Poljanska Sora	river	biofilm	2019-07-01	N	N	NA	NA	N	N	N	NA	NA	N	N	N	NA	NA	N	N	N	NA	NA	N	1.2 ***	N	N	NA	NA	N	N	N	N	NA	NA	N	N
SA1	Sava, P1	river	biofilm	2019-06-19	N	N	NA	NA	N	N	N	NA	NA	N	N	N	NA	NA	N	N	N	NA	NA	1	11.0 ***	3.95E+04 **	3.35E+02 **	NA	NA	N	N	N	N	NA	NA	1	N
SA2	Sava, P2	river	biofilm	2019-07-16	N	N	NA	NA	N	N	N	NA	NA	N	N	N	NA	NA	N	N	N	NA	NA	1	N	N	N	NA	NA	N	N	N	N	NA	NA	1	N
RI	Rizana	river	biofilm	2019-07-02	N	N	NA	NA	N	N	N	NA	NA	N	N	N	NA	NA	N	N	N	NA	NA	1	N	N	N	NA	NA	N	N	N	N	NA	NA	1	N
LJ	Ljubljanica	river	biofilm	2019-08-19	N	N	NA	NA	N	N	N	NA	NA	N	N	N	NA	NA	N	N	N	NA	NA	1	N	N	N	NA	NA	N	N	N	N	NA	NA	1	N
KO	Koseze Pond	urban pond	biofilm	2019-10-23	N	N	NA	NA	N	N	N	NA	NA	N	N	N	NA	NA	N	N	N	NA	NA	2	N	N	N	NA	NA	N	N	1.75E+05 *	563.489	NA	NA	2	N
TI	Tivoli Pond	urban pond	biofilm	2019-10-23	N	N	NA	NA	N	N	N	NA	NA	N	N	N	NA	NA	N	N	N	NA	NA	2	N	N	N	NA	NA	N	N	N	N	NA	NA	2	N
GL	Glinscica	urban stream	biofilm	2019-10-23	N	N	NA	NA	N	N	N	NA	NA	N	N	N	NA	NA	N	N	N	NA	NA	1	N	N	N	NA	NA	N	N	N	N	NA	NA	1	N
