# Supplementary material for: Potentially Toxic Planktic and Benthic Cyanobacteria in Slovenian Freshwater Bodies: Detection by Quantitative PCR
Source: Toxins (Basel). 2021 Feb 11;13(2):133. doi: 10.3390/toxins13020133 (PMC7917684; doi:10.3390/toxins13020133)
Supplement: Supplementary file 1 [file toxins-13-00133-s001.zip › Supplementary file S9.xlsx]

## Sheet: Sheet2
Supplementary table S9: List of cyanobacterial taxa identified by microscopy in plankton and biofilm samples, with potentially toxic taxa underlined. For plankton, results are given in number of cells (cc) per mililiter. For biofilm, results are given in a semi-quantitative way based on the most abundant target species; 1 - very rare, 2 - rare, 3 - present, 4 - frequent, 5 - dominant. Sample IDs …
PLANKTON [cc/mL]
Taxon	Potential cyanotoxins	BL1.1	BL1.2	BL1.3	BL1.4	BL1.5	BL1.6	BL1.7	BL1.8	BL1.9	BL1.10	BL1.11	BL1.12	BO1	BO2	BO3	PE1	PE2	PE3	PE4	SL1	SL2	SL3	VO1	VO2	VO3
Aphanizomenon flos-aquae	CYN, SXT	N	N	N	N	N	N	N	N	N	N	N	N	N	N	N	N	222.222	1666.67	N	24.6914	N	N	N	N	N
Aphanizomenon issatschenkoi	CYN, SXT	N	N	N	N	N	N	N	N	N	N	N	N	N	N	N	N	3	240	202	N	N	N	N	N	N
Aphanizomenon sp.	CYN, SXT	155.039	N	N	N	N	N	N	N	N	N	N	N	N	N	N	N	N	N	N	N	N	N	N	N	N
Aphanocapsa delicatissima	-	N	N	N	N	N	N	N	N	N	N	6250	N	1100	N	N	N	25	N	N	N	N	N	N	N	N
Aphanocapsa elachista	-	N	N	N	N	N	N	N	N	N	N	N	N	N	N	N	N	N	N	N	N	N	N	N	N	1355.93
Aphanocapsa holsatica	-	2500	1000	1000	N	N	N	N	N	N	N	N	N	N	N	N	N	N	N	N	N	N	N	N	N	N
Aphanocapsa incerta	-	N	N	N	N	N	N	N	N	N	N	N	N	N	N	N	N	N	N	N	N	N	N	N	N	17200
Aphanocapsa planctonica	-	N	N	N	750	750	1875	N	15000	1875	N	N	N	N	N	N	39687.5	1250	N	N	16250	N	N	N	5600	350
Aphanothece bachmannii	-	N	N	N	N	N	N	N	N	N	N	N	N	5700	N	1800	N	N	N	N	N	N	N	N	N	N
Aphanothece clathrata	-	7500	N	1000	2500	2500	2500	32500	600000	65000	N	2500	N	N	N	N	N	N	N	N	N	N	N	132222	N	1511.11
Aphanothece floccosa	-	N	N	N	N	N	N	N	N	N	2250	N	N	750	6000	N	N	N	N	N	8250	8250	N	N	N	350
Aphanothece nidulans	-	N	N	N	N	N	N	N	N	N	N	N	N	N	N	N	21000	2000	72000	1000	N	N	N	N	N	N
Aphanothece sp.	-	N	N	N	N	N	N	N	N	N	N	N	N	N	N	N	N	N	N	N	4761.9	N	N	N	N	N
Chroococcus limneticus	-	N	N	N	N	N	N	N	N	N	N	N	N	N	N	N	N	N	N	N	7.51634	7.51634	N	N	255.902	N
Chroococcus planctonicus	-	N	N	N	N	N	N	2.02128	N	2.02128	N	N	N	N	N	N	N	N	N	N	N	N	N	N	N	N
Cyanocatena planctonica	-	N	N	N	N	N	N	N	N	N	N	N	N	N	N	N	119025	N	107438	N	14375	625	1062.5	N	N	N
Cyanodictyon planktonicum	-	N	N	N	N	N	N	N	N	N	666667	N	N	N	N	N	N	N	N	N	N	N	N	N	N	N
Cyanodictyon reticulatum	-	N	N	N	N	N	N	N	36764.7	95588.2	7352.94	7352.94	N	N	N	N	N	N	N	N	N	N	N	4901.96	N	N
Cyanodictyon sp.	-	N	N	N	N	N	N	N	N	N	86666.7	N	N	N	N	N	N	N	N	N	N	N	N	N	N	N
Cylindrospermopsis raciborskii	CYN, SXT	N	N	N	N	N	N	N	N	N	N	N	N	N	N	N	N	96.7249	N	3249.96	N	N	N	N	N	N
Dolichospermum crassum	MC, CYN, SXT	N	N	N	N	N	N	N	N	N	N	N	N	N	N	N	N	N	17295.3	N	N	N	N	N	N	N
Dolichospermum flos-aquae	MC, CYN, SXT	N	N	N	N	N	N	N	N	N	N	N	N	N	N	N	834.646	216.535	3464.57	N	N	N	N	N	N	N
Dolichospermum lemmermannii	MC, CYN, SXT	N	N	N	N	N	N	127.119	N	N	N	N	N	N	N	N	N	N	N	N	N	N	N	N	N	N
Dolichospermum planctonicum	MC, CYN, SXT	N	N	N	N	N	N	N	N	N	N	N	N	N	N	N	N	521.739	91826.1	N	N	N	N	N	N	N
Eucapsis sp.	-	N	N	N	N	N	N	N	N	N	N	N	N	N	N	N	18666.3	N	63.0194	N	N	N	N	N	N	N
Limnothrix planctonica	-	N	N	N	N	N	N	N	N	N	N	N	N	N	N	N	N	835.655	42409.5	37905.3	N	N	N	N	N	N
Merismopedia sp.	-	N	N	N	N	N	N	N	N	N	N	N	N	N	N	N	90	147.857	N	N	N	N	N	N	N	N
Microcystis aeruginosa	MC	N	N	N	N	N	N	N	N	N	N	N	N	N	N	N	N	50.0376	150.113	N	564.334	564.334	N	N	N	N
Microcystis flos-aquae	MC	N	N	N	N	N	N	N	N	N	N	55.5556	69.4444	N	N	N	N	182.5	3285	N	416.667	83.3333	83.3333	N	N	104.167
Microcystis wesenbergii	-	N	N	N	N	N	N	N	N	N	N	N	N	N	N	N	N	58.1395	581.395	N	166.558	N	N	N	N	N
Phormidium amoenum	MC, SXT	N	N	N	N	N	N	N	N	N	N	N	N	N	N	N	N	N	N	N	N	636.537	318.269	N	N	5.41057
Phormidium sp.	MC, SXT	N	N	N	N	N	N	N	N	N	N	N	N	N	N	N	N	356.814	371.681	N	N	N	N	N	N	N
Planktolyngbya contorta	-	N	N	N	N	N	N	N	N	N	N	N	N	N	N	N	105	26.25	350	N	N	N	N	N	N	N
Planktolyngbya limnetica	-	N	N	N	N	N	N	N	N	N	N	N	N	N	N	N	71.3287	332.867	71.3287	213.986	N	N	N	N	N	N
Planktothrix agardhii	MC	N	N	N	N	N	N	N	N	N	N	N	N	N	N	N	1618.12	9708.74	455663	706796	N	N	N	N	N	N
Planktothrix rubescens	MC	54834.9	61910.4	32429.2	3537.74	3537.74	3537.74	5896.23	2948.11	2948.11	5896.23	29481.1	47169.8	N	N	N	3537.74	N	N	1768.87	N	N	N	N	N	N
Pseudanabaena catenata	MC	N	N	N	N	N	N	N	N	N	N	N	N	N	N	N	25216.4	N	1344.87	64016	N	N	N	N	N	N
Pseudanabaena limnetica	MC	N	N	N	N	N	N	N	N	N	N	N	N	N	N	N	58195.6	18545.5	1545.45	87237.8	N	N	N	N	N	N
Pseudanabaena sp.	MC	N	N	N	N	N	N	32.7869	32.7869	1967.21	N	N	N	N	N	N	N	N	N	N	N	N	N	N	N	N
Romeria okensis	-	N	N	N	N	N	N	N	N	N	N	N	N	N	N	N	34539.7	1349.21	5396.83	10.7937	N	N	N	N	N	N
Snowella atomus	-	N	N	N	N	N	N	N	N	N	N	N	N	N	N	N	N	213	N	10	N	N	N	N	N	N
Snowella lacustris	-	N	N	N	N	N	N	N	N	N	N	N	N	N	N	N	111.111	1388.89	166111	N	N	N	N	N	N	N
Woronichinia naegeliana	-	N	N	N	N	N	N	N	N	N	N	N	N	N	N	N	N	N	N	N	2507.29	125.364	N	N	N	87.4636
Woronichinia sp.	-	N	N	N	N	N	N	N	N	N	N	N	N	N	N	N	N	N	N	5.8309	N	N	N	N	N	N
BIOFILM (relative abundance)
Taxon	Potential cyanotoxins	BL2.1	BL2.2	BL2.3	BL2.4	BL2.5	BL2.6	BL2.7	BL2.8	BL2.9	BL2.10	SO1	SO2	SO3	LU	BI	PS	SA1	SA2	RI	LJ	KO	TI	GL
Aphanocapsa sp.	-	N	N	N	N	N	N	N	N	N	N	N	N	N	N	N	N	N	N	N	N	2	N	1
Aphanothece sp.	-	N	N	1	N	N	N	1	N	N	N	N	N	N	N	N	N	N	N	N	N	N	N	1
Calothrix sp.	-	N	N	N	N	N	N	N	N	N	N	N	N	N	N	N	N	N	N	N	N	4	N	1
Chamaesiphon sp.	-	N	N	N	N	N	N	N	N	N	N	N	N	N	N	N	N	N	N	N	N	N	N	1
Cyanobium sp.	-	N	N	N	N	N	N	N	N	N	N	N	N	N	N	N	N	N	N	N	N	1	2	N
Cyanodiction sp.	-	N	N	N	N	N	N	N	N	N	N	N	N	N	N	N	N	N	N	N	N	N	2	N
Cyanothece sp.	-	N	N	N	N	N	N	N	N	N	N	N	N	N	N	N	N	N	N	N	N	2	N	N
Homoeothrix varians	-	3	3	2	3	3	3	2	2	3	2	N	N	1	N	1	1	1	1	N	3	N	N	N
Leptolyngbya sp.	-	N	N	N	N	N	N	N	N	N	N	N	N	N	N	N	N	N	N	N	N	1	N	N
Oscillatoria sp.	MC	N	1	N	N	N	N	N	N	N	N	N	N	N	N	N	N	N	N	N	N	N	N	N
Phormidium autumnale	MC, SXT	N	N	N	N	N	N	N	N	N	N	N	N	1	N	N	N	N	1	N	N	N	N	N
Phormidium sp.	MC, SXT	N	1	1	1	N	1	1	1	N	N	1	1	N	N	1	N	1	N	1	1	2	2	1
Pleurocapsa minor	-	1	N	N	1	1	3	N	1	1	N	N	N	N	N	N	N	N	N	N	N	N	N	N
Pleurocapsa sp.	-	N	N	N	N	N	N	N	N	N	N	N	N	N	N	N	N	N	N	N	N	N	N	1
Pseudanabaena catenata	MC	N	N	N	N	N	N	N	N	N	N	N	N	N	N	N	N	N	N	N	N	1	N	N
Schizothrix sp.	-	N	N	1	N	N	N	N	N	N	N	N	N	N	N	N	N	N	N	N	N	N	N	N
Tychonema sp.	-	N	N	N	N	N	N	N	N	N	N	N	N	N	N	N	N	N	N	N	N	2	N	N
