# Supplementary material for: Potentially Toxic Planktic and Benthic Cyanobacteria in Slovenian Freshwater Bodies: Detection by Quantitative PCR
Source: Toxins (Basel). 2021 Feb 11;13(2):133. doi: 10.3390/toxins13020133 (PMC7917684; doi:10.3390/toxins13020133)
Supplement: Supplementary file 1 [file toxins-13-00133-s001.zip › Supplementary file S10.xlsx]

## Sheet: Sheet1
Supplementary table S10: Nucleotide sequences of synthetic DNA fragments, used for reference. Regions of primer binding are underlined.
Assay	Nucleotide sequence of synthetic DNA fragment	Reference strain	GenBank accession number
mcyE-Ana	TTACCTCTATAGGTAAGACAATTGCTTTCTCAATCTCGGTATAGCGGCTAATTTGGTATTCAATTTCTCCTGGATCTACACGATAGCCATTGACCTTAACTTGATTATCTTTTCGCCCTATAAATTCAATCACACCTGGAGCAATTTGTTTACCTAAATCTCCCGTTCTAAAGAGAATTTTTTCTGAATTTAAAAAGTTGGGTTGAAATTTTTCTCTGGTAATTTCAGGAAGATTACGATAACCAACTGCTAATGCTGCACCTTCTACACAAATTTCACCGATTACGTGCAGAGGTACGGGGTGATT	Anabaena sp. 90	AJ536156.1
mcyE-Mic	TAACTTGAACGGGTAAAACAATCGCTCTTTCAATGGGAGCATAACGAGTCAATTGATATTCAATTTCTCCGGGGTCAATTCGATAACCATTGACCTTAACTTGATTATCTTTTCGTCCCATAAACTCAATGATACCGGGAGCAGTTTGCTTGCCTAAATCGCCGGTTCTAAAGAGAGTTTTTGTCTCATCAAGAAAGCTAGGTTTAAATTTTTCTTGAGTCATTTCGGGTTGGTTATGATAACCCGATGCTAGGGCGGCACCTTCTACACAAATTTCGCCGATTACATGGAGGGGAACGGGATTATT	Microcystis aeruginosa PCC 7806	AF183408.1
mcyE-Pla	AATAATCCAGTTCCTCTGCATATAGTTGGGGAAATTTGTGTAGAAGGTGCAGCCTTAGCATCGGGTTATCACAATCTTCCTCAAATCACAAAAGAAAAATTTAAACCTGGCTTTTTTAATCAGAAAACAACGATGTTTAGAACCGGGGATTTAGGGAAACAAACTGCTCCCGGTGTGATTGAATTTATGGGCAGAAAAGACAATCAAGTTAAGGTAAATGGCTATCGTATCGACCCCGAAGAAATTGAATATCAACTTAATCGTTATCCTCAGATTGAGAGAGCTATTATTCTACCGATATCAGTCAAT	Planktothrix agardhii 213	EU151891.1
cyrJ	GCCAACTGAGCATTGTCTCGGTAAACTCAACCCCTACAACCTGACAAAGCTTGGAGAGCATTCTCCGCGGATCGTTCAGCAAGTCGTGTGCATCTATGACAGGCGGGATTACTCCGCTCGTTTGATGTACATAGTCA	Aphanizomenon sp. 10E6	GQ385961.1
sxtA	ATTCAATCAAAATACCCATGCCGAAATTCTCTGCATCTTCTGGACGGTAATTAGCAATAATTCCCCTAATTTCGGCTCCTCCCGACACATGGAACCCCACAATCGGATCTAGAAGCTGCCGTTGCTCGTTGTGTAGCTTCAAATACTCCGTCATCGGCATTTGGGAATAATTGACATAATTGCGA	Anabaena circinalis AWQC131C	DQ787201.1
16S-cyano	ACGATCAGTAGCTGGTCTGAGAGGATGATCAGCCACACTGGGACTGAGACACGGCCCAGACTCCTACGGGAGGCAGCAGTGGGGAATTTTCCGCAATGGGCGAAAGCCTGACGGAGCAATACCGCGTGAGGGA	Anabaena circinalis AWQC131C	AF247589.1
